# Supplementary material
Source: Research Square preprint supplement (doi:10.21203/rs.3.rs-9668766/v1)
Supplement: Supplementary file 1 [file 0b10483a3b69dce8688a40fa.docx]

**Table S1.** Primers used for RT-qPCR

| Gene name | Primer Sequence (5' -3') | Length (bp) | Tm (℃) |
| --- | --- | --- | --- |
| *General bacteria* | F: CGGCAACGAGCGCAACCC | 130 | 60 |
|  | R: CCATTGTAGCACGTGTGTAGCC |  |  |
| *Prevotella* | R: ACCTTATGATGGCAACTAACAATA | 418 | 56 |
|  | F: GAAGGTCCCCCACATTG |  |  |
| *F. succinogenes* | F: GTTCGGAATTACTGGGCGTAAA | 121 | 56 |
|  | R: CGCCTGCCCCTGAACTATC |  |  |
| *R. albus* | F: CCCTAAAAGCAGTCTTAGTTCG | 175 | 55 |
|  | R: CCTCCTTGCGGTTAGAACA |  |  |
| *General protozoa* | F: TTCCTAGAGATAGGAAGTTTCTTCGG | 275 | 60 |
|  | R: GATGGCACTAGATGTCAAGACC |  |  |
| *Entodinium* | F: CAGCTAATACATGCTAAGGC | 260 | 60 |
|  | R: CCCTCACTACAATCGAGATTTAAGG |  |  |

**Table S2.** Topological properties of bacterial network between HY and LY groups.

| Group | HY | LY |
| --- | --- | --- |
| nodes | 152 | 161 |
| Edges | 1490 | 1711 |
| Modularity (MD) | 0.388 | 0.397 |
| Clustering coefficient (CC) | 0.5 | 0.54 |
| Average path length (APL) | 2.464 | 2.357 |
| Graph density (GD) | 0.13 | 0.133 |
| Average degree (AD) | 19.605 | 21.255 |

**Table S3.** Key Enzymes and Source Bacteria Associated with Propionate Production.

| Enzyme | Source Bacterium | GenBank |
| --- | --- | --- |
| Malate dehydrogenase | *Succiniclasticum runitvis* DSM 9236 | SFE68090.1 |
| Methylmalonyl-CoA mutase | *Succiniclasticum runitvis* DSM 9236 | SFE43830.1 |
| Methylmalonyl-CoA epimerase | *Succiniclasticum runitvis* | WP_093912429.1 |
| Fumarase | *Succiniclasticum runitvis* | SDC72196.1 |
| Succinate dehydrogenase | *Prevotella fusca* JCM 17724 | AKU69390.1 |


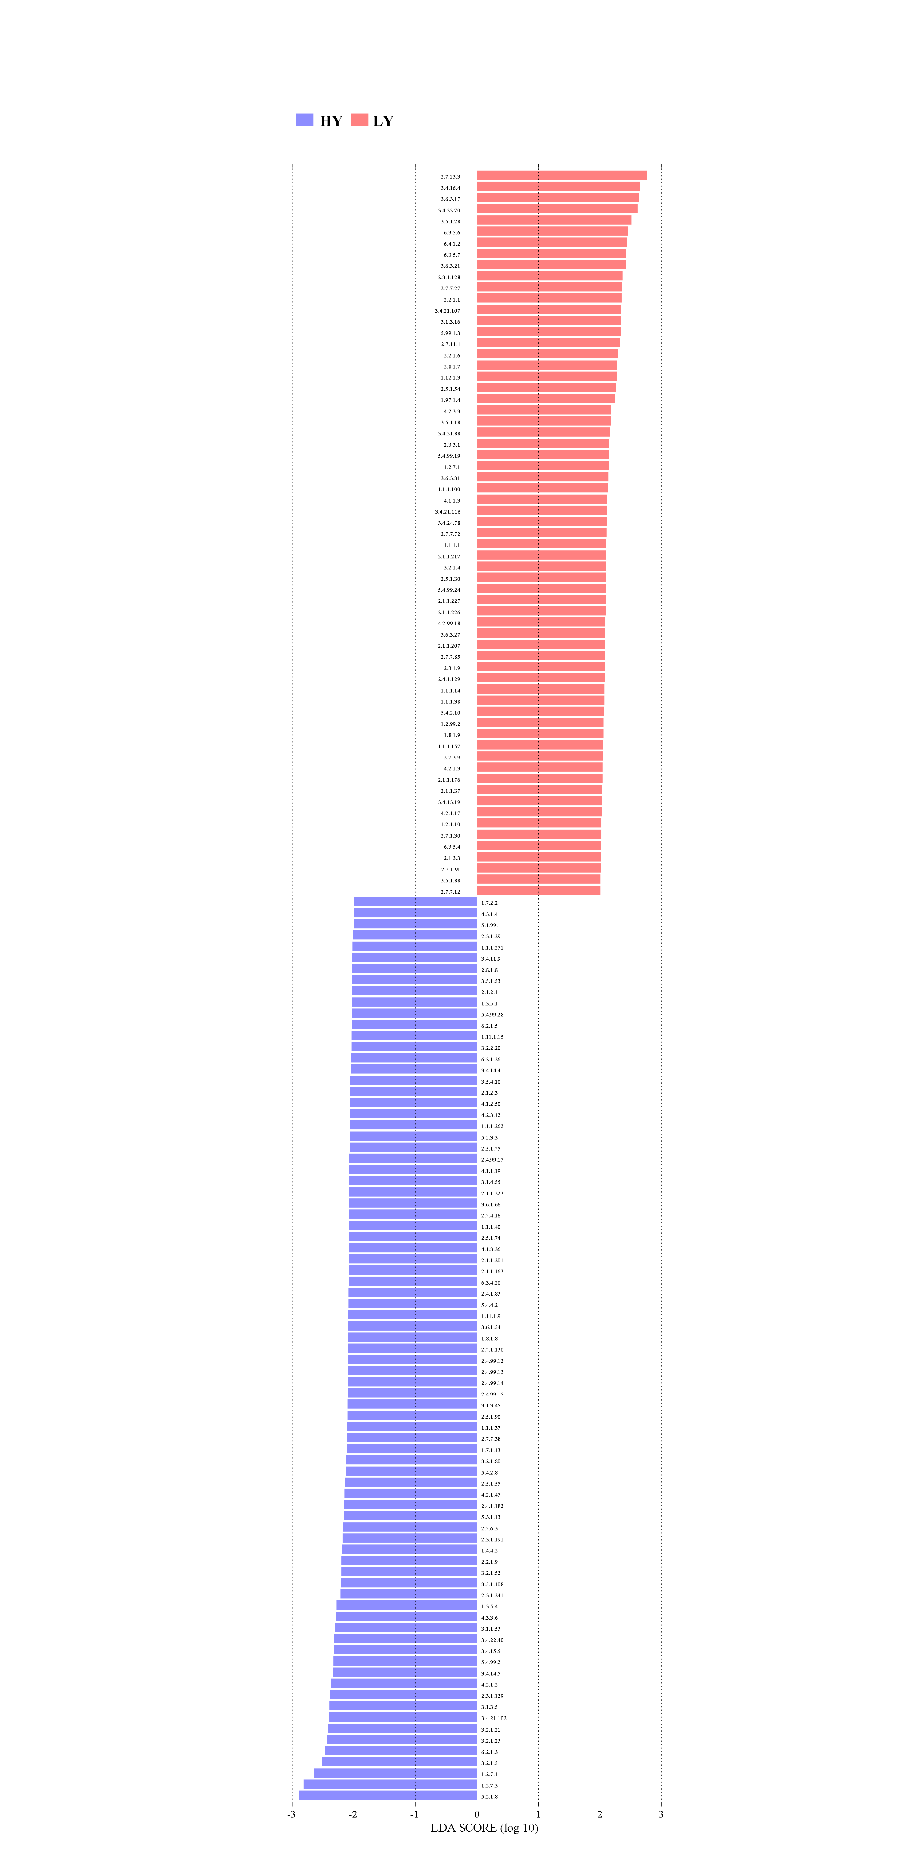


**Fig S1.** LEFSe plot of differential KEGG metabolic enzymes (P < 0.05, LDA > 2.0) in the HY and LY groups.
